# Supplementary material for: Year-round temporal stability of a tropical, urban plant-pollinator network
Source: PubMed Central journal article supplement (PMC7147774; doi:10.1371/journal.pone.0230490), 2020-04-10
Supplement: pone.0230490.s001.pdf [file pone.0230490.s001.pdf]

**S1 Figure. Map of study parks in Bangkok, Thailand.**

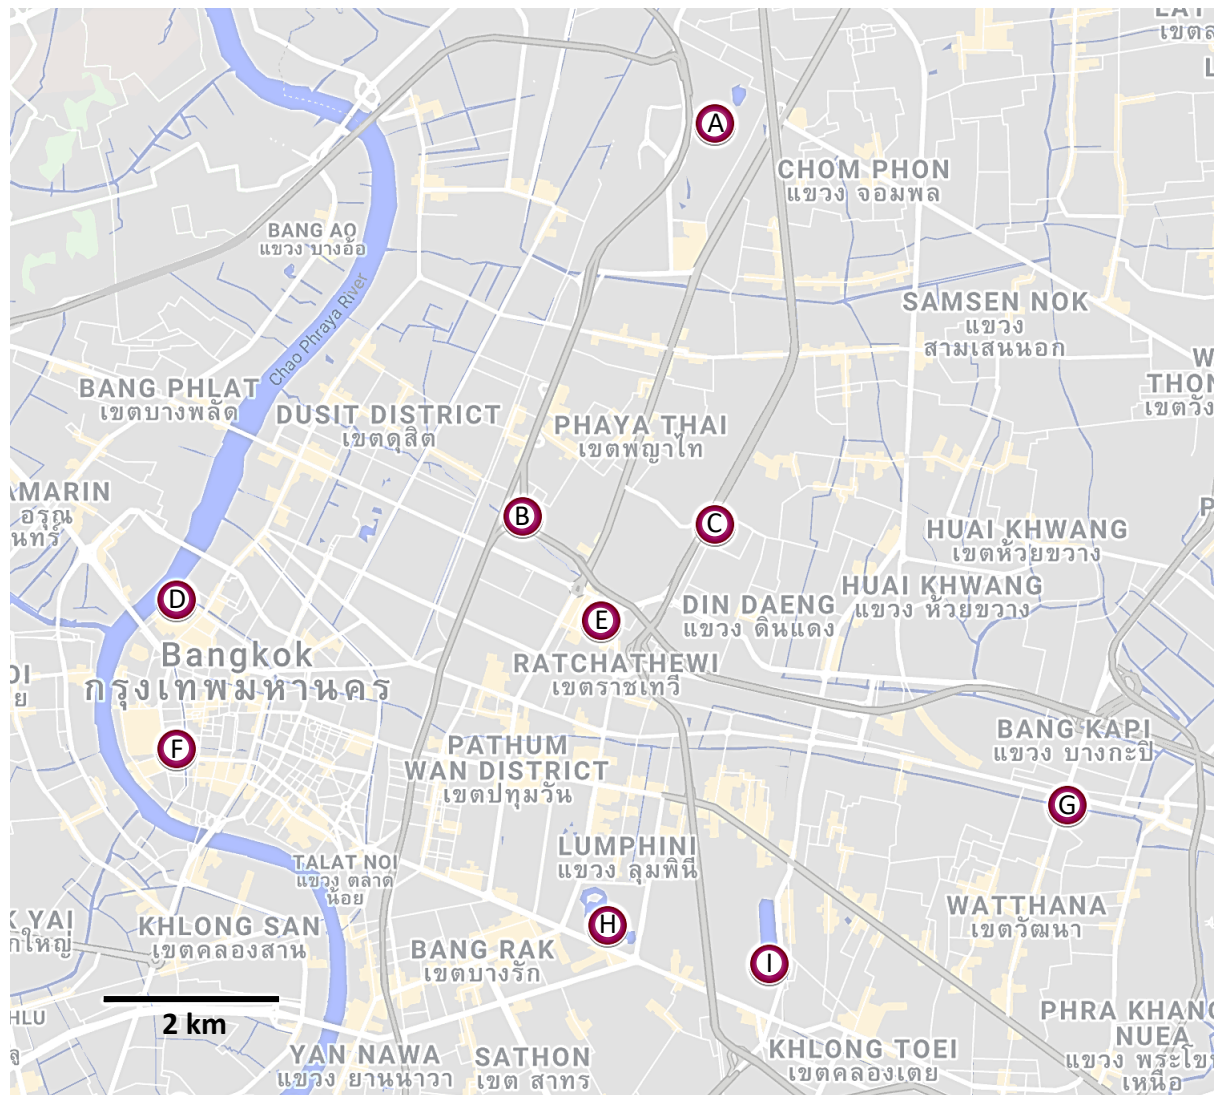

- (A) Wachirabenchathat Park (1,097,600 m<sup>2</sup>). (B) Phaya Thai Pirom Garden (28,600 m<sup>2</sup>). (C) Vibhavadi Rangsit Forest Park (23,300 m<sup>2</sup>). (D) Santi Chai Prakan Public Park (13,600 m<sup>2</sup>). (E) Santiphap Park (32,000 m<sup>2</sup>). (F) Saranrom Park (36,800 m<sup>2</sup>). (G) Somdet Saranrat Maneerom Public Park (34,500 m<sup>2</sup>). (H) Lumpini Park (576,000 m<sup>2</sup>). (I) Benjakitti Park (108,000 m<sup>2</sup>).
