# Supplementary material for: Year-round temporal stability of a tropical, urban plant-pollinator network
Source: PubMed Central journal article supplement (PMC7147774; doi:10.1371/journal.pone.0230490), 2020-04-10
Supplement: pone.0230490.s004.pdf [file pone.0230490.s004.pdf]

**S1 Table. Pollinator species observed in Bangkok, Thailand between December 2017 – November 2018.**

|    | Order                      | Family       | Species                        | #<br>Individuals | %     | Code<br>Name |
|----|----------------------------|--------------|--------------------------------|------------------|-------|--------------|
| 1  | Hymenoptera                | Apidae       | <i>Amegilla</i> sp.            | 27               | 0.34  | A6           |
| 2  |                            |              | <i>Apis cerana</i>             | 555              | 6.89  | A4           |
| 3  |                            |              | <i>Apis dorsata</i>            | 396              | 4.92  | A3           |
| 4  |                            |              | <i>Apis florea</i>             | 1,417            | 17.60 | A2           |
| 5  |                            |              | <i>Tetragonula</i> sp.         | 4,844            | 60.15 | A1           |
| 6  |                            |              | <i>Xylocopa aestuans</i>       | 27               | 0.34  | A5           |
| 7  |                            | Halictidae   | <i>Lasioglossum</i> sp.        | 300              | 3.73  | A10          |
| 8  |                            |              | <i>Nomia</i> sp.               | 1                | 0.01  | A9           |
| 9  |                            | Megachilidae | <i>Megachile disjuncta</i>     | 7                | 0.09  | A7           |
| 10 |                            |              | <i>Megachile sculpturalis</i>  | 3                | 0.04  | A8           |
| 11 |                            | Scoliidae    | <i>Campsomeris</i> sp.         | 53               | 0.66  | A11          |
| 12 |                            |              | <i>Megacampsomeris</i> sp.     | 3                | 0.04  | A12          |
| 13 |                            |              | Scoliidae 1                    | 16               | 0.20  | A17          |
| 14 |                            |              | Scoliidae 2                    | 3                | 0.04  | A18          |
| 15 |                            |              | Scoliidae 3                    | 2                | 0.02  | A19          |
| 16 |                            |              | Scoliidae 4                    | 3                | 0.04  | A20          |
| 17 |                            |              | Scoliidae 5                    | 3                | 0.04  | A21          |
| 18 |                            | Vespidae     | <i>Delta pyriforme</i>         | 1                | 0.01  | A13          |
| 19 |                            |              | <i>Polistes</i> sp.            | 4                | 0.05  | A14          |
| 20 |                            |              | <i>Rhynchium</i> sp.           | 3                | 0.04  | A16          |
| 21 |                            |              | <i>Ropalidia</i> sp.           | 1                | 0.01  | A15          |
| 22 |                            |              | <i>Vespa affinis</i>           | 1                | 0.01  | A22          |
| 23 |                            | Unknown      | Unknown sp.                    | 1                | 0.01  | A23          |
| 24 | Lepidoptera                | Hesperiidae  | <i>Suastus gremius</i>         | 1                | 0.01  | A46          |
| 25 |                            |              | <i>Udaspes folus</i>           | 1                | 0.01  | A43          |
| 26 |                            | Lycaenidae   | <i>Chilades lajus</i>          | 14               | 0.17  | A31          |
| 27 |                            |              | <i>Chilades pandava</i>        | 3                | 0.04  | A30          |
| 28 |                            |              | <i>Leptotes plinius</i>        | 7                | 0.09  | A42          |
| -  |                            |              | <i>Zizina</i> OR <i>Zizula</i> | 10               | 0.12  | A47          |
| 29 |                            |              | <i>Zizina otis</i>             | 12               | 0.15  | A48          |
| 30 |                            |              | <i>Zizula hylax</i>            | 7                | 0.09  | A49          |
| 31 |                            | Nymphalidae  | <i>Cethosia cyane</i>          | 1                | 0.01  | A29          |
| 32 |                            |              | <i>Danaus chrysippus</i>       | 25               | 0.31  | A33          |
| 33 |                            |              | <i>Danaus genutia</i>          | 1                | 0.01  | A34          |
| 34 |                            |              | <i>Elymnias hypermnestra</i>   | 4                | 0.05  | A36          |
| 35 |                            |              | <i>Euthalia aconthea</i>       | 3                | 0.04  | A37          |
| 36 |                            |              | <i>Hypolimnas bolina</i>       | 3                | 0.04  | A40          |
| 37 | <i>Junonia lemonias</i>    |              | 1                              | 0.01             | A41   |              |
| 38 | <i>Parantica agleoides</i> |              | 1                              | 0.01             | A45   |              |

|       | Order     | Family        | Species                    | #<br>Individuals | %    | Code<br>Name |
|-------|-----------|---------------|----------------------------|------------------|------|--------------|
| 39    |           | Papilionidae  | <i>Graphium doson</i>      | 3                | 0.04 | A39          |
| 40    |           |               | <i>Papilio demoleus</i>    | 10               | 0.12 | A44          |
| 41    |           | Pieridae      | <i>Appias olferna</i>      | 4                | 0.05 | A24          |
| 42    |           |               | <i>Catopsilia pomona</i>   | 16               | 0.20 | A26          |
| 43    |           |               | <i>Catopsilia pyranthe</i> | 1                | 0.01 | A27          |
| 44    |           |               | <i>Delias hyparete</i>     | 7                | 0.09 | A35          |
| 45    |           |               | <i>Eurema hecabe</i>       | 7                | 0.09 | A38          |
| 46    |           | Sphingidae    | <i>Cephonodes hylas</i>    | 1                | 0.01 | A28          |
| 47    | Diptera   | Sarcophagidae | Sarcophagidae sp.          | 2                | 0.02 | A53          |
| 48    |           | Syrphidae     | <i>Eristalinus</i>         | 2                | 0.02 | A52          |
| 49    |           |               | Syrphidae 1                | 3                | 0.04 | A54          |
| 50    |           |               | Syrphidae 2                | 1                | 0.01 | A55          |
| 51    |           |               | Syrphidae 3                | 1                | 0.01 | A56          |
| 52    |           |               | Syrphidae 4                | 1                | 0.01 | A57          |
| 53    |           | Tachinidae    | Tachinidae sp.             | 2                | 0.02 | A58          |
| 54    |           | Tephritidae   | <i>Bactrocera</i> 1        | 16               | 0.20 | A50          |
| 55    |           |               | <i>Bactrocera</i> 2        | 1                | 0.01 | A51          |
| 56    |           |               | Tephritidae sp.            | 165              | 2.05 | A59          |
| 57    | Unknown   | Unknown sp.   | 5                          | 0.06             | A60  |              |
| 58    | Hemiptera | Rhopalidae    | Rhopalidae sp.             | 40               | 0.50 | A61          |
| Total |           |               |                            | 8,053            | 100  |              |

Code names refer to the labels used in the pollination networks (S2 Fig).
