# Supplementary material for: Year-round temporal stability of a tropical, urban plant-pollinator network
Source: PubMed Central journal article supplement (PMC7147774; doi:10.1371/journal.pone.0230490), 2020-04-10
Supplement: pone.0230490.s005.pdf [file pone.0230490.s005.pdf]

**S2 Table. Plant species at which pollinator observations were conducted (Bangkok, Thailand; December 2017 – November 2018).**

|    | Family                                                     | Species                                                                         | Status  | Code Name |
|----|------------------------------------------------------------|---------------------------------------------------------------------------------|---------|-----------|
| 1  | Acanthaceae                                                | <i>Andrographis paniculata</i> (Burm.f.) Nees                                   | unclear | P9        |
| 2  |                                                            | <i>Asystasia gangetica</i> (L.) T.Anders.                                       | native  | P12       |
| 3  |                                                            | <i>Crossandra infundibuliformis</i> (L.) Nees                                   | native  | P42       |
| 4  |                                                            | <i>Justicia betonica</i> L.                                                     | exotic  | P71       |
| 5  |                                                            | <i>Justicia brandegeana</i> Wassh. & L.B.Sm.                                    | exotic  | P72       |
| 6  |                                                            | <i>Pseuderanthemum curtatum</i> (C. B. Cl.) Merrill                             | unclear | P99       |
| 7  |                                                            | <i>Pseuderanthemum carruthersii</i> (Seem.) Guill.                              | exotic  | P100      |
| 8  |                                                            | <i>Ruellia simplex</i> C.Wright                                                 | exotic  | P104      |
| 9  |                                                            | <i>Ruspolia hypocrateriformis</i> (Vahl) Milne-Redh.                            | exotic  | P105      |
| 10 |                                                            | <i>Thunbergia grandiflora</i> (Roxb. ex Rottl.) Roxb.                           | unclear | P125      |
| 11 | Alismataceae                                               | <i>Echinodorus cordifolius</i> (L.) Griseb                                      | exotic  | P49       |
| 12 | Amaranthaceae                                              | <i>Amaranthus viridis</i> L.                                                    | exotic  | P8        |
| 13 |                                                            | <i>Celosia argentea</i> L.                                                      | native  | P27       |
| 14 |                                                            | <i>Gomphrena globosa</i> L.                                                     | native  | P57       |
| 15 | Amaryllidaceae                                             | <i>Crinum asiaticum</i> L.                                                      | native  | P41       |
| 16 |                                                            | <i>Hymenocallis littoralis</i> (Jacq.) Salisb.                                  | exotic  | P64       |
| 17 | Anacardiaceae                                              | <i>Mangifera indica</i> L.                                                      | native  | P79       |
| 18 | Annonaceae                                                 | <i>Cananga odorata</i> (Lam.) Hook.f. & Thomson                                 | exotic  | P21       |
| 19 | Apocynaceae                                                | <i>Adenium obesum</i> (Forssk.) Roem. & Schult.                                 | exotic  | P2        |
| 20 |                                                            | <i>Allamanda blanchetii</i> A.DC.                                               | exotic  | P4        |
| 21 |                                                            | <i>Allamanda cathartica</i> L.                                                  | exotic  | P5        |
| 22 |                                                            | <i>Alstonia scholaris</i> (L.) R. Br.                                           | native  | P7        |
| 23 |                                                            | <i>Catharanthus roseus</i> (L.) G.Don                                           | exotic  | P26       |
| 24 |                                                            | <i>Cerbera odollam</i> Gaertn.                                                  | native  | P28       |
| 25 |                                                            | <i>Kopsia arborea</i> Blume                                                     | native  | P73       |
| 26 |                                                            | <i>Nerium oleander</i> L.                                                       | exotic  | P85       |
| 27 |                                                            | <i>Pentalinon luteum</i> (L.) B.F.Hansen & Wunderlin                            | exotic  | P92       |
| 28 |                                                            | <i>Plumeria</i> spp.                                                            | exotic  | P96       |
| 29 |                                                            | <i>Tabernaemontana divaricata</i> (L.) R.Br. ex Roem. & Schult.                 | native  | P118      |
| 30 | <i>Wrightia religiosa</i> (Teijsm. & Binn.) Benth. ex Kurz | native                                                                          | P131    |           |
| 31 | Araceae                                                    | <i>Spathiphyllum cannifolium</i> (Dryand. ex Sims) Schott                       | exotic  | P115      |
| 32 | Arecaceae                                                  | <i>Ptychosperma macarthurii</i> (H.Wendl. ex H.J.Veitch)<br>H.Wendl. ex Hook.f. | exotic  | P101      |
| 33 | Balsaminaceae                                              | <i>Impatiens balsamina</i> L.                                                   | exotic  | P66       |
| 34 |                                                            | <i>Impatiens</i> sp.                                                            | --      | P65       |
| 35 | Bignoniaceae                                               | <i>Bignonia magnifica</i> W.Bull                                                | exotic  | P109      |
| 36 |                                                            | <i>Crescentia alata</i> Kunth                                                   | exotic  | P40       |
| 37 |                                                            | <i>Tabebuia aurea</i> (Silva Manso) Benth. & Hook.f. ex<br>S.Moore              | exotic  | P116      |
| 38 |                                                            | <i>Tabebuia rosea</i> (Bertol.) Bertero ex A.DC.                                | exotic  | P117      |
| 39 |                                                            | <i>Tecoma stans</i> (L.) Juss. ex Kunth                                         | exotic  | P121      |

|    | Family                      | Species                                                           | Status  | Code Name |
|----|-----------------------------|-------------------------------------------------------------------|---------|-----------|
| 40 | Boraginaceae                | <i>Cordia sebestena</i> L.                                        | exotic  | P37       |
| 41 |                             | <i>Ehretia monopyrena</i> Gottschling & Hilger                    | native  | P23       |
| 42 |                             | <i>Heliotropium indicum</i> L.                                    | native  | P61       |
| 43 | Cannaceae                   | <i>Canna indica</i> L.                                            | exotic  | P22       |
| 44 | Cleomaceae                  | <i>Tarenaya spinosa</i> (Jacq.) Rafin.                            | exotic  | P31       |
| 45 | Combretaceae                | <i>Combretum erythrophyllum</i> (Burch.) Sond.                    | exotic  | P34       |
| 46 |                             | <i>Combretum indicum</i> (L.) C. C. H. Jongkind                   | native  | P35       |
| 47 | Compositae                  | <i>Chrysanthemum morifolium</i> (Ramat.)                          | exotic  | P45       |
| 48 |                             | <i>Cosmos</i> sp.                                                 | exotic  | P38       |
| 49 |                             | <i>Cosmos sulphureus</i> Cav.                                     | exotic  | P39       |
| 50 |                             | <i>Eclipta prostrata</i> (L.) L.                                  | unclear | P50       |
| 51 |                             | <i>Helianthus annuus</i> L.                                       | exotic  | P59       |
| 52 |                             | <i>Rudbeckia laciniata</i> L.                                     | exotic  | P103      |
| 53 |                             | <i>Sphagneticola trilobata</i> (L.) Pruski                        | exotic  | P130      |
| 54 |                             | <i>Tagetes erecta</i> L.                                          | exotic  | P119      |
| 55 |                             | <i>Thymophylla tenuiloba</i> (DC.) Small                          | exotic  | P126      |
| 56 |                             | <i>Tithonia rotundifolia</i> (Mill.) S.F.Blake                    | exotic  | P127      |
| 57 |                             | <i>Zinnia angustifolia</i> Kunth                                  | exotic  | P135      |
| 58 | <i>Zinnia violacea</i> Cav. | exotic                                                            | P136    |           |
| 59 | Convolvaceae                | <i>Convolvulus sabatius</i> Viv.                                  | exotic  | P36       |
| 60 |                             | <i>Ipomoea carnea</i> Jacq.                                       | exotic  | P67       |
| 61 | Costaceae                   | <i>Hellenia speciosa</i> (J.Koenig) S.R.Dutta                     | native  | P29       |
| 62 | Dilleniaceae                | <i>Tetracera loureiri</i> (Finet & Gagnep.) Pierre ex W. G. Craib | native  | P122      |
| 63 | Dipterocarpaceae            | <i>Shorea robusta</i> Gaertn.                                     | unclear | P111      |
| 64 | Euphorbiaceae               | <i>Euphorbia milii</i> Des Moul.                                  | exotic  | P53       |
| 65 |                             | <i>Jatropha integerrima</i> Jacq.                                 | exotic  | P70       |
| 66 | Heliconiaceae               | <i>Heliconia</i> spp.                                             | exotic  | P60       |
| 67 | Lamiaceae                   | <i>Callicarpa americana</i> L.                                    | exotic  | P19       |
| 68 |                             | <i>Coleus scutellarioides</i> (L.) Benth.                         | native  | P94       |
| 69 |                             | <i>Gmelina philippensis</i> Cham.                                 | native  | P56       |
| 70 |                             | <i>Ocimum basilicum</i> L.                                        | native  | P87       |
| 71 |                             | <i>Orthosiphon aristatus</i> (Blume) Miq.                         | native  | P88       |
| 72 |                             | <i>Rotheca microphylla</i> (Blume) Callm. & Phillipson            | exotic  | P32       |
| 73 |                             | <i>Salvia divinorum</i> Epling & Játiva                           | exotic  | P107      |
| 74 | Leguminosae                 | <i>Bauhinia acuminata</i> L.                                      | native  | P13       |
| 75 |                             | <i>Bauhinia purpurea</i> L.                                       | native  | P14       |
| 76 |                             | <i>Bauhinia tomentosa</i> L.                                      | native  | P15       |
| 77 |                             | <i>Caesalpinia pulcherrima</i> (L.) Sw.                           | exotic  | P17       |
| 78 |                             | <i>Calliandra haematocephala</i> Hassk.                           | unclear | P18       |
| 79 |                             | <i>Cassia bakeriana</i> Craib                                     | native  | P24       |
| 80 |                             | <i>Cassia fistula</i> L.                                          | native  | P25       |
| 81 |                             | <i>Clitoria ternatea</i> L.                                       | native  | P33       |
| 82 |                             | <i>Crotalaria juncea</i> L.                                       | native  | P43       |

|     | Family         | Species                                                | Status  | Code Name |
|-----|----------------|--------------------------------------------------------|---------|-----------|
| 83  | Leguminosae    | <i>Erythrina variegata</i> L.                          | native  | P51       |
| 84  |                | <i>Peltophorum pterocarpum</i> (DC.) K.Heyne           | native  | P91       |
| 85  |                | <i>Saraca indica</i> L.                                | native  | P108      |
| 86  |                | <i>Senna siamea</i> (Lam.) H.S.Irwin & Barneby         | native  | P110      |
| 87  | Linderniaceae  | <i>Torenia fournieri</i> Linden ex E. Fourn.           | native  | P128      |
| 88  | Lythraceae     | <i>Cuphea hyssopifolia</i> Kunth                       | exotic  | P44       |
| 89  |                | <i>Lagerstroemia floribunda</i> Jack                   | native  | P74       |
| 90  |                | <i>Lagerstroemia indica</i> L.                         | native  | P75       |
| 91  |                | <i>Lagerstroemia speciosa</i> (L.) Pers.               | native  | P76       |
| 92  | Malpighiaceae  | <i>Galphimia glauca</i> Cav.                           | exotic  | P124      |
| 93  | Malvaceae      | <i>Abelmoschus moschatus</i> (L.) Medicus              | unclear | P1        |
| 94  |                | <i>Alcea rosea</i> L.                                  | exotic  | P3        |
| 95  |                | <i>Dombeya</i> sp.                                     | --      | P47       |
| 96  |                | <i>Hibiscus schizopetalus</i> (Dyer) Hook.f.           | exotic  | P62       |
| 97  |                | <i>Hibiscus syriacus</i> L.                            | exotic  | P63       |
| 98  | Marantaceae    | <i>Thalia geniculata</i> L.                            | exotic  | P123      |
| 99  | Musaceae       | <i>Musa acuminata</i> Colla                            | native  | P83       |
| 100 | Myrtaceae      | <i>Callistemon lanceolatus</i> (Sm.) Sweet             | exotic  | P20       |
| 101 |                | <i>Xanthostemon chrysanthus</i> (F.Muell.) Benth.      | exotic  | P132      |
| 102 |                | <i>Xanthostemon verdugonianus</i> Naves ex Fern.-Vill. | exotic  | P133      |
| 103 | Nyctaginaceae  | <i>Bougainvillea</i> hybrid                            | exotic  | P16       |
| 104 | Nymphaeaceae   | <i>Nymphaea</i> sp.                                    | --      | P86       |
| 105 | Oleaceae       | <i>Jasminum</i> sp.                                    | --      | P69       |
| 106 | Orchidaceae    | <i>Dendrobium</i> sp.                                  | --      | P46       |
| 107 | Passifloraceae | <i>Turnera ulmifolia</i> L.                            | exotic  | P129      |
| 108 | Plantaginaceae | <i>Achetaria azurea</i> (Linden) V.C.Souza             | exotic  | P89       |
| 109 |                | <i>Angelonia goyazensis</i> G. Benth.                  | exotic  | P10       |
| 110 |                | <i>Russelia equisetiformis</i> Schldl. & Cham.         | exotic  | P106      |
| 111 | Plumbaginaceae | <i>Plumbago auriculata</i> Lam.                        | exotic  | P95       |
| 112 | Poaceae        | unknown sp.                                            | --      | P58       |
| 113 |                | <i>Zea mays</i> L.                                     | exotic  | P134      |
| 114 | Portulacaceae  | <i>Portulaca grandiflora</i> Hook.                     | exotic  | P97       |
| 115 |                | <i>Portulaca oleracea</i> L.                           | unclear | P98       |
| 116 | Rosaceae       | <i>Rosa</i> spp.                                       | --      | P102      |
| 117 | Rubiaceae      | <i>Arachnothryx leucophylla</i> (Kunth) Planch.        | exotic  | P11       |
| 118 |                | <i>Gardenia carinata</i> Wall. ex Roxb.                | native  | P54       |
| 119 |                | <i>Gardenia</i> spp.                                   | --      | P55       |
| 120 |                | <i>Ixora lobbii</i> Loudon                             | native  | P68       |
| 121 |                | <i>Morinda citrifolia</i> L.                           | native  | P81       |
| 122 |                | <i>Mussaenda philippica</i> A.Rich.                    | native  | P84       |
| 123 |                | <i>Oxyceros horridus</i> Lour.                         | native  | P90       |
| 124 |                | <i>Tarenna wallichii</i> (Hook.f.) Ridl.               | native  | P120      |
| 125 | Rutaceae       | <i>Murraya paniculata</i> (L.) Jack                    | native  | P82       |

|     | Family           | Species                                                | Status | Code Name |
|-----|------------------|--------------------------------------------------------|--------|-----------|
| 126 | Sapotaceae       | <i>Mimusops elengi</i> L.                              | native | P80       |
| 127 | Scrophulariaceae | <i>Leucophyllum frutescens</i> (Berland.) I.M. Johnst. | exotic | P78       |
| 128 | Solanaceae       | <i>Petunia atkinsiana</i> D. Don ex Loud.              | exotic | P93       |
| 129 |                  | <i>Solandra grandiflora</i> Sw.                        | exotic | P112      |
| 130 |                  | <i>Solanum torvum</i> Sw.                              | exotic | P113      |
| 131 |                  | <i>Solanum virginianum</i> L.                          | native | P114      |
| 132 | Verbenaceae      | <i>Citharexylum spinosum</i> L.                        | exotic | P30       |
| 133 |                  | <i>Duranta erecta</i> L.                               | exotic | P48       |
| 134 |                  | <i>Lantana camara</i> L.                               | exotic | P77       |
| 135 | Zingiberaceae    | <i>Alpinia galanga</i> (L.) Willd.                     | native | P6        |
| 136 |                  | <i>Etilingera elatior</i> (Jack) R.M.Sm.               | native | P52       |

Status information was obtained from the Catalogue of Life website (<http://www.catalogueoflife.org>; accessed November 2019): native – listed as native in Thailand or Southeast Asia; exotic – listed as introduced in Thailand or Southeast Asia; unclear – distribution data is not clear (e.g., listed as native in certain neighboring countries, but no information reported for Thailand). Code names refer to the labels used in the pollination networks (S2 Fig).
